# Supplementary material for: The diagnostic accuracy of acute phase proteins and proinflammatory cytokines in sheep with pneumonic pasteurellosis
Source: PeerJ. 2016 Jul 19;4:e2161. doi: 10.7717/peerj.2161 (PMC4957991; doi:10.7717/peerj.2161)
Supplement: Data S1 [file peerj-04-2161-s001.xlsx]

## Sheet: Sheet1
Group	Hp	SAA	Fp	IL-1α	IL-1β	TNF-α	IFN-ϒ	IL-6
0	0.062	4.36	2.36	13.26	18.23	8.52	10.26	9.36
0	0.051	4.56	2.41	14.26	16.25	9.23	11.25	8.59
0	0	3.56	2.11	16.23	20.36	7.59	12.45	10.25
0	0.062	3.96	2.33	15.24	17.26	7.84	11.25	11.25
0	0.053	3.65	2.41	13.26	19.36	8.45	10.36	13.26
0	0.045	4.12	2.36	14.25	19.45	9.26	10.36	12.45
0	0	4.56	2.22	15.23	17.25	10.24	11.23	11.45
0	0.06	5.25	2.13	16.25	18.26	9.25	10.36	10.45
0	0.062	5.26	2.21	15.23	19.24	10.11	9.36	9.66
0	0.054	5.21	2.31	14.26	20.36	9.25	8.25	8.99
0	0.063	4.88	2.24	13.26	18.26	7.15	8.79	8.87
0	0	4.75	2.31	10.26	19.45	7.45	9.56	10.36
0	0.054	4.65	2.41	11.25	17.26	8.45	8.45	11.36
0	0.062	3.95	2.42	12.36	16.54	8.63	10.36	12.25
0	0.048	3.75	2.51	14.25	16.98	9.34	11.25	10.25
0	0.062	4.22	2.52	12.36	18.79	7.36	10.36	9.36
0	0.063	5.12	2.41	10.26	17.49	8.26	8.69	10.45
0	0.057	1.21	2.36	11.45	19.26	8.26	9.56	11.25
0	0.54	4.87	2.34	12.45	20.14	8.77	9.58	10.36
0	0.47	4.56	2.51	14.26	19.56	9.21	8.59	12.45
1	1.6.3	29.36	4.23	28.26	31.26	19.36	16.36	17.36
1	1.81	28.26	3.26	25.36	30.26	20.36	15.34	18.26
1	1.95	26.35	3.21	26.36	31.26	18.36	9.36	19.36
1	2.14	29.36	2.51	27.26	32.45	19.36	9.56	18.25
1	0	30.26	2.41	12.36	17.25	18.54	8.26	9.6
1	0.065	31.25	2.36	13.25	19.26	8.25	15.26	10.25
1	0	32.54	4.25	11.25	18.26	19.36	16.25	9.66
1	0	29.26	4.23	14.26	19.26	18.36	17.26	11.24
1	1.68	4.25	4.12	29..63	30.26	19.25	15.24	17.25
1	1.87	5.21	3.69	28.26	31.26	20.31	16.36	18.23
1	2.14	29.36	3.59	27.26	32.15	9.33	16.77	17.25
1	2.15	29.34	3.56	25.36	30.26	8.74	17.25	16.36
1	2.36	28.45	3.88	26.35	31.26	20.31	9.36	15.48
1	1.85	30.26	4.21	28.26	32.15	19.25	8.25	18.25
1	1.97	31.26	4.11	27.26	30.12	20.14	7.59	18.23
1	1.78	5.12	3.25	28.36	29.36	18.57	8.26	17.46
1	1.6	28.26	2.33	29.36	32.26	17.25	9.36	18.23
1	2.21	28.36	2.42	26.35	33.26	22.36	11.36	16.35
1	2.41	29.45	2.51	29.36	30.21	18.26	10.36	17.45
1	2.36	31.25	3.62	28.26	30.12	19.45	17.26	18.36
1	2.36	31.26	3.96	27.36	31.25	18.45	18.36	19.23
1	2.22	30.26	4.12	25.36	32.45	19.25	16.36	18.45
1	1.94	32.26	4.52	25.36	30.45	17.25	15.26	17.44
1	1.97	27.26	3.65	24.36	31.25	18.39	18.25	15.66
1	1.85	4.55	2.36	26.35	30.26	20.14	16.36	18.45
1	0	29.36	2.45	12.36	17.55	20.15	17.46	9.36
1	0.065	28.26	2.51	25.36	33.26	8.36	17.23	17.45
1	1.69	32.15	3.69	24.26	30.26	9.25	16.35	18.36
1	1.96	31.26	4.12	26.35	30.15	20.67	18.26	15.24
1	1.87	28.26	4.23	25.36	32.26	9.65	17.25	15.47
1	2.1	29.36	4.22	24.36	31.45	19.45	18.23	16.33
1	2.22	28.36	3.96	28.36	29.35	18.46	16.25	16.42
1	1.98	27.36	3.48	27.26	29.45	19.54	17.45	15.44
1	1.63	29.36	3.78	26.36	30.26	18.77	16.25	15.36
1	1.87	30.26	3.66	25.36	31.06	20.15	18.23	17.23
1	1.77	31.26	2.51	24.56	32.15	19.54	10.36	17.11
